# Social Selection and the Evolution of Maladaptation

**Joel W. McGlothlin and David N. Fisher**

Department of Biological Sciences, Virginia Tech, Derring Hall Room 2125, 926 West Campus Drive (MC 0406), Blacksburg, VA 24061 (McGlothlin, e-mail: [joelmcg@vt.edu](mailto:joelmcg@vt.edu))

School of Biological Sciences, University of Aberdeen, King's College, Aberdeen, United Kingdom AB24 3FX (Fisher, e-mail: [david.fisher@abdn.ac.uk](mailto:david.fisher@abdn.ac.uk))

Address correspondence to J. McGlothlin at the address above, or e-mail: [joelmcg@vt.edu](mailto:joelmcg@vt.edu)

Running title: Social Selection and Maladaptation

1 **Abstract**

2 Evolution by natural selection is often viewed as a process that inevitably leads to  
3 adaptation, or an increase in population fitness over time. However, maladaptation,  
4 an evolved decrease in fitness, may also occur in response to natural selection  
5 under some conditions. Social effects on fitness (or social selection) have been  
6 identified as a potential cause of maladaptation, but we lack a general rule identifying  
7 when social selection should lead to a decrease in population mean fitness. Here we  
8 use a quantitative genetic model to develop such a rule. We show that maladaptation  
9 is most likely to occur when social selection is strong relative to the nonsocial  
10 component of selection and acts in an opposing direction. In this scenario,  
11 evolutionary increases in traits that impose fitness costs on others may outweigh  
12 evolved gains in fitness for the individual, leading to a net decrease in population  
13 mean fitness. Further, we find maladaptation may also sometimes occur when  
14 phenotypes of interacting individuals negatively covary. We outline the biological  
15 situations where maladaptation in response to social selection can be expected,  
16 provide both quantitative genetic and phenotypic versions of our derived result, and  
17 suggest what empirical work would be needed to test it. We also consider the effect  
18 of social selection on inclusive fitness and support previous work showing that  
19 inclusive fitness cannot suffer an evolutionary decrease. Taken together, our results  
20 show that social selection may decrease population mean fitness when it opposes  
21 individual-level selection, even as inclusive fitness increases.

22

23 **Subject area:** Quantitative genetics and Mendelian inheritance

24 **Key words:** adaptation, fundamental theorem of natural selection, indirect genetic effects,  
25 maladaptation, social selection

## 26 **Introduction**

27 Adaptive evolution is often visualized as a hill-climbing process, with natural selection  
28 causing populations to ascend peaks of higher fitness on an adaptive landscape (Wright 1932;  
29 Simpson 1944; Lande 1976, 1979; Arnold et al. 2001; Estes and Arnold 2007; Svensson and  
30 Calsbeek 2012; Hendry 2017). The adaptive landscape view implies that natural populations  
31 should tend to be either well adapted to their current environment, i.e., occupying a local  
32 fitness peak, or adapting, i.e., climbing a local fitness peak. Directional selection has been  
33 shown to be particularly common in nature, suggesting that populations are indeed often  
34 adapting to stable or changing environmental conditions (Hoekstra et al. 2001; Kingsolver et  
35 al. 2001; Hereford et al. 2004; Siepielski et al. 2009, 2013; Kingsolver and Diamond 2011;  
36 Morrissey and Hadfield 2012; Hendry 2017). More limited evidence for stabilizing selection  
37 suggests that natural populations are sometimes at or near fitness peaks, at least for some  
38 traits (Kingsolver et al. 2001; Estes and Arnold 2007; Kingsolver and Diamond 2011). Under  
39 certain circumstances, however, maladaptation may occur; i.e., populations may have  
40 suboptimal mean fitness or may even be undergoing an evolved reduction in mean fitness.  
41 Maladaptation has many potential causes, including genetic constraints, genetic drift, and  
42 mutational load (Brady et al. 2019a, b). Here, we focus on the somewhat counterintuitive  
43 possibility that selection itself may drive maladaptation (Wright 1942; Lande 1976; Svensson  
44 and Connallon 2019).

45       Models and empirical studies of the evolution of population fitness under natural  
46 selection often focus on Fisher's (1930) fundamental theorem of natural selection, which  
47 states that the change in population mean fitness due to natural selection is equal to a  
48 population's additive genetic variance for fitness (Price 1972a; Frank and Slatkin 1992; Burt  
49 1995; Frank 1997; Hendry et al. 2018; Bonnet et al. 2019). Interpreted naïvely, the  
50 fundamental theorem would appear to suggest that maladaptation is impossible, as the  
51 additive genetic variance in fitness can never be less than zero. However, in Fisher's view,  
52 adaptive evolution was often opposed by what he called the "deterioration of the  
53 environment," which would reduce mean fitness, allowing populations to undergo continuous  
54 evolutionary change (Fisher 1930; Frank and Slatkin 1992). In some cases, the deterioration  
55 of the environment may overwhelm adaptation, causing evolutionary stasis or maladaptation  
56 (Merilä et al. 2001a, b; Brady et al. 2019a).

57 Deterioration of the environment is often equated with changes in the abiotic  
58 environment or interspecific competition, but Fisher viewed the concept as encompassing  
59 non-additive gene action and other within-species effects (Price 1972a; Frank and Slatkin  
60 1992; Hadfield et al. 2011). Selection itself may even underlie environmental deterioration—  
61 and thus maladaptation—particularly when selection is frequency dependent (Wright 1942,  
62 1969; Lande 1979; Hadfield et al. 2011; Svensson and Connallon 2019). In extreme cases,  
63 selection may decrease population mean fitness enough to lead to population extinction, a  
64 phenomenon known as “self-extinction” (Matsuda and Abrams 1994), “evolutionary suicide”  
65 (Gyllenberg and Parvinen 2001), or “Darwinian extinction” (Webb 2003). Social interactions  
66 are particularly likely to create conditions where selection leads to a decrease in fitness  
67 (Matsuda and Abrams 1994; Kokko and Brooks 2003; Fisher and McAdam 2019; Henriques  
68 and Osmond 2020). While social effects on the fitness of others may enhance adaptation  
69 when the interests of social partners are aligned (Henriques and Osmond 2020),  
70 maladaptation and even population extinction are possible when selection leads to the  
71 evolution of competitive traits that increase individual fitness at the expense of others  
72 (Wright 1969; Matsuda and Abrams 1994; Webb 2003). Such social fitness effects give rise  
73 to social selection (West-Eberhard 1979; Wolf et al. 1999), which is often inherently  
74 frequency-dependent because an individual’s fitness depends not only on its own phenotype  
75 but also those of its social partners (Maynard Smith 1982; Sinervo and Lively 1996; Sinervo  
76 and Calsbeek 2006). Social selection is therefore a potential driver of maladaptation.

77 Several recent models have explicitly considered social interactions in the context of  
78 Fisher’s fundamental theorem (Bijma 2010b; Hadfield et al. 2011; Queller 2014; Fisher and  
79 McAdam 2019). Bijma (2010b) developed a model that included heritable influences of an  
80 individual’s social environment, or indirect genetic effects (IGEs) on fitness. Bijma’s  
81 approach showed that the increase in population fitness predicted by Fisher’s fundamental  
82 theorem is equivalent to a population’s change in inclusive fitness, supporting earlier  
83 conclusions that selection tends to lead to the optimization of inclusive fitness (Hamilton  
84 1964; Grafen 2006). Bijma identified that the deviation between change in inclusive fitness  
85 and change in population mean fitness stems from the deterioration of the environment  
86 caused by social competition. Hadfield et al. (2011) further showed that earlier models of  
87 decreases in population fitness due to intraspecific competition (Cooke et al. 1990) produced  
88 an effect equivalent to Fisher’s (1930) deterioration of the environment. Queller (2014)  
89 elaborated on these results, explicitly modeling the decrease in fitness caused by antagonistic

90 social interactions and discussing conditions in which the change in mean population fitness  
91 would diverge from the change in inclusive fitness. Finally, Fisher and McAdam (2019)  
92 showed that such socially mediated decreases in population fitness may be viewed as arising  
93 from a negative covariance between direct and indirect genetic effects on fitness. Although  
94 the direct component of fitness should always increase, there can be correlated changes in  
95 how individuals influence the fitness of others, perhaps due to competition for limited  
96 resources. An increase in the detrimental effects on the fitness of others due to a negative  
97 direct-indirect genetic covariance is equivalent to a deterioration of the social environment  
98 and can potentially be large enough to lead to maladaptation.

99         Despite these earlier works, we lack a clear rule identifying when selection should  
100 lead to maladaptation. Here, we develop such a rule by reformulating earlier results in terms  
101 of social selection, which we define as the influence of the traits of an individual's social  
102 partners on its fitness (Wolf et al. 1999). Our model expresses fitness as a function of  
103 individual and social traits, which allows us to make explicit connections between phenotypic  
104 evolution and the change in population fitness. We then develop expressions predicting when  
105 social interactions should lead to maladaptation in terms of selection gradients that can be  
106 estimated in natural populations, providing an empirical test for socially mediated  
107 maladaptation that can be employed in natural populations.

108

## 109 **Social selection and the evolution of fitness**

110 To determine when social interactions should lead to the evolution of maladaptation, we  
111 model the predicted change in fitness in response to two types of phenotypic selection.  
112 Nonsocial (or natural) selection ( $\beta_N$ ) measures the effect of a focal individual's own traits on  
113 its own fitness, while social selection ( $\beta_S$ ) measures the effect of the traits of social partners  
114 on a focal individual's fitness. For the purposes of the model, we define maladaptation as an  
115 evolved decrease in fitness ( $W$ ) from one generation to the next. We make no assumptions  
116 about fitness other than it can be decomposed into a heritable component (or breeding value,  
117  $A_W$ ) and a residual component ( $e_W$ ), which are assumed to be uncorrelated. The absolute  
118 fitness of an individual is often operationally defined in quantitative genetics as its lifetime  
119 reproductive success, with the generational dividing line placed at the zygote stage (Arnold  
120 and Wade 1984; Wolf and Wade 2001). Because our model involves only a single generation  
121 of evolutionary change, lifetime reproductive success is a suitable surrogate for absolute

122 fitness in the derivation that follows. Extension of our results to long-term predictions would  
123 require incorporating an explicit model of population regulation (Hendry 2017), which is  
124 beyond the scope of this paper.

125 Although maladaptation ultimately involves a change in population mean fitness, for a  
126 single generation, this change is proportional to the predicted change in mean relative fitness.  
127 We define relative fitness ( $w$ ) as absolute fitness divided by the population mean fitness, or

128

$$129 \quad w = \frac{W}{\bar{W}} = \frac{1}{\bar{W}} (A_W + e_W). \quad (1)$$

130

131 Equation 1 implies that the breeding value for relative fitness can be written as

132

$$133 \quad A_w = \frac{A_W}{\bar{W}}, \quad (2)$$

134

135 which indicates that for a single generation, the change in absolute fitness due to selection  
136 will be related to the change in relative fitness multiplied by a constant,  $\bar{W}$ . From the Price  
137 (1970, 1972b) equation, the component of evolutionary change in fitness due to selection is

138

$$139 \quad \Delta \bar{w} = \text{Cov}(A_w, w). \quad (3)$$

140

141 Equation 3 does not include changes in mean fitness that are solely due to environmental  
142 effects, and in the absence of social effects, is equal to the additive genetic variance in  
143 relative fitness, or equivalently, the evolvability of fitness (Fisher 1930; Price 1972a; Frank  
144 and Slatkin 1992; Houle 1992; Burt 1995; Orr 2009; Hendry et al. 2018).

145 When there are social effects on fitness, however, Equation 3 will not equal the  
146 additive genetic variance in relative fitness. Previous models have decomposed the total  
147 breeding value for fitness into direct and indirect (social) components (Bijma 2010b; Fisher  
148 and McAdam 2019). Here we link this decomposition to phenotypic selection, which

149 ultimately underlies genetic variance for fitness and in most cases, is easier to estimate in  
150 nature. Our goal is to describe the conditions in which a combination of nonsocial and social  
151 selection should lead to maladaptation ( $\Delta\bar{w} < 0$ ). To this end, we first express relative fitness  
152 as a function of focal and social phenotypes,

153

$$154 \quad w = w_0 + \boldsymbol{\beta}_N^T \mathbf{z} + n\boldsymbol{\beta}_S^T \bar{\mathbf{z}}' + \varepsilon, \quad (4)$$

155

156 (Wolf et al. 1999; McGlothlin et al. 2010) where the intercept ( $w_0$ ) is a population parameter  
157 and the error term ( $\varepsilon$ ) has a mean of zero. In Equation 4,  $\mathbf{z}$  is a vector of a focal individual's  
158 traits, and  $\bar{\mathbf{z}}'$  is a vector containing the mean phenotypes of that individual's social  
159 interactants. The superscript T designates matrix transposition, which here indicates that a  
160 column vector is to be written as a row vector. The product of each selection gradient and  
161 phenotype vector is thus a scalar.

162 Mean relative fitness can be calculated by taking the expectation of Equation 4,

163

$$164 \quad \bar{w} = w_0 + (\boldsymbol{\beta}_N^T + n\boldsymbol{\beta}_S^T) \bar{\mathbf{z}}, \quad (5)$$

165

166 where  $\bar{\mathbf{z}}$  is the vector of population mean phenotypes. Equation 5 assumes that all individuals  
167 have  $n$  social partners, but if social group size varies and  $n$  and  $\bar{\mathbf{z}}'$  are uncorrelated  $n$  can be  
168 rewritten as  $\bar{n}$ . We then define an individual's total breeding value for relative fitness ( $A_w$ ) as

169

$$170 \quad A_w = (\boldsymbol{\beta}_N^T + n\boldsymbol{\beta}_S^T) \mathbf{A}, \quad (6)$$

171

172 where  $\mathbf{A}$  represents an individual's vector of total breeding values for the phenotypes  
173 represented by  $\mathbf{z}$ . This definition of  $A_w$  decomposes an individual's effect on population  
174 mean fitness into effects of individual traits. Through the two selection gradients, trait effects  
175 are further decomposed into nonsocial and social components. Therefore, these components

176  $(\beta_N^T \mathbf{A}$  and  $n\beta_S^T \mathbf{A}$ , respectively) are the trait-based equivalents of the total direct and indirect  
177 genetic effects on fitness (Fisher and McAdam 2019).

178 Because breeding values for fitness are now a function of phenotypic breeding values,  
179 the change in relative fitness due to one generation of phenotypic selection can be found by  
180 substituting Equation 6 into Equation 3:

181

$$182 \quad \Delta \bar{w} = (\beta_N^T + n\beta_S^T) \text{Cov}(\mathbf{A}, w). \quad (7)$$

183

184 From the Price (1970, 1972b) equation, the covariance between the phenotypic breeding  
185 value and fitness equals the total phenotypic change due to selection ( $\Delta \bar{z}$ ), so Equation 7 can  
186 be rewritten as

187

$$188 \quad \Delta \bar{w} = (\beta_N^T + n\beta_S^T) \Delta \bar{z}. \quad (8)$$

189

190 This phenotypic change can itself be expanded as a function of selection, direct and indirect  
191 genetic effects, and relatedness (Bijma and Wade 2008; McGlothlin et al. 2010). When social  
192 selection, relatedness, and IGEs are absent, our equation is equivalent to the result derived by  
193 Lande (1979).

194 Without further expansion, Equation 8 leads to a very simple result. Because the  
195 product of two vectors is proportional to the cosine of the angle between them ( $\theta$ ), we can  
196 rewrite the right-hand side of Equation 8 as

197

$$198 \quad (\beta_N^T + n\beta_S^T) \Delta \bar{z} = \|\beta_N^T + n\beta_S^T\| \|\Delta \bar{z}\| \cos \theta \quad (9)$$

199

200 where the double vertical bar notation indicates the vector norm. The cosine function is  
201 bound by -1 and 1, implying that  $\theta$  is between  $0^\circ$  (vectors completely aligned) and  $180^\circ$   
202 (vectors completely misaligned). It then follows that selection will lead to adaptation ( $\Delta \bar{w} >$   
203 0) when  $0^\circ \leq \theta < 90^\circ$  and maladaptation ( $\Delta \bar{w} < 0$ ) when  $\theta > 90^\circ$ , with the maximum



204 decrease in fitness occurring when  $\theta = 180^\circ$  (cf. Hadfield and Thomson 2017). In other  
205 words, an alignment between the sum of nonsocial and social selection and phenotypic  
206 evolutionary change leads to adaptation, while misalignment leads to maladaptation.

207 Lande (1979) showed that when social effects are absent and when selection is  
208 frequency-independent,  $\Delta\bar{w} = \boldsymbol{\beta}_N^T \Delta\bar{\mathbf{z}} = \boldsymbol{\beta}_N^T \mathbf{G} \boldsymbol{\beta}_N \geq 0$ , where  $\mathbf{G}$  is the additive genetic  
209 (co)variance matrix. Lande's result indicates that, under these assumptions, natural selection  
210 and evolutionary change are always aligned (or at least orthogonal) and that selection should  
211 never lead to a decrease in fitness. However, Equation 9 shows that when social effects exist,  
212 selection and evolutionary change may be misaligned (Fisher and Pruitt 2019), which  
213 predicts a decrease in population fitness. Fisher and McAdam (2019) discuss a number of  
214 scenarios involving social interactions that can lead to ongoing trait evolution with zero  
215 change in population fitness or even maladaptation. For example, population may be limited  
216 by the availability of refuges, food, mates, or some other resource, leading to social  
217 competition. When competition occurs, the same traits that lead to individual benefits will  
218 reduce the success of competitors, which should tend to create nonsocial and social selection  
219 gradients in opposing directions. This effect has been identified as a source of evolutionary  
220 constraint and has been referred to as both the "intraspecific Red Queen" and the "treadmill  
221 of competition" (Rice and Holland 1997; Wolf 2003; Wilson et al. 2009, 2011; Wilson 2014).

222 To understand the types of selection that may lead to a misalignment between  
223 selection and evolutionary response, it is instructive to examine the simplest case, the  
224 evolution of a single trait. In this case, the condition for maladaptation simplifies to

225

$$226 \quad (\beta_N + \beta_S)(C_{AZ}\beta_N + C_{AZ'}\beta_S) < 0. \quad (10)$$

227

228 where  $C_{AZ}$  is the covariance between an individual's breeding value and its own phenotype  
229 and  $C_{AZ'}$  is the covariance between an individual's breeding value and its partner's phenotype  
230 (McGlothlin et al., 2010). These covariance terms in turn depend on genetic variance ( $G$ ),  
231 relatedness ( $r$ ), which we define as the correlation between a focal individual's additive  
232 genetic value and that of its social partner, and the interaction coefficient  $\psi$ , which measures  
233 the effect of a social partner's trait on phenotypic expression in the focal individual. When

234 traits are heritable,  $\psi$  represents the strength and direction of trait-based IGEs (Moore et al.  
235 1997). Expanding, the two covariances in Equation 10 can be written as

236

$$237 \quad C_{Az} = \frac{G(1+r\psi)}{(1-\psi)(1-\psi^2)} \quad (11a)$$

$$238 \quad C_{Az'} = \frac{G(r+\psi)}{(1-\psi)(1-\psi^2)} \quad (11b)$$

239

240 (McGlothlin et al. 2010). The denominators in Equation 11 represent IGE feedback effects  
241 that occur because the effects on trait expression are bidirectional (Moore et al. 1997).  
242 Substituting these terms into Equation 10 and rearranging, we can express the conditions for  
243 maladaptation as

244

$$245 \quad (1+r\psi)\beta_N^2 + (1+r)(1+\psi)\beta_N\beta_S + (r+\psi)\beta_S^2 < 0. \quad (12)$$

246

247 Because  $r$  and  $\psi$  are normally bound by -1 and 1, the occurrence of maladaptation depends  
248 on two key quantities,  $\beta_N\beta_S$  and  $r+\psi$ . These two quantities respectively represent conflict in  
249 the levels of selection and the two pathways, relatedness and IGEs, by which interacting  
250 phenotypes may become correlated. On their own, or in concert, these two quantities can be  
251 sufficiently negative to overwhelm the first term of on the left-hand side of Equation 12,  
252 which is always positive. Stated another way, maladaptation is most likely to occur when  
253 nonsocial and social selection are in conflict and/or when the phenotypes of interacting  
254 individuals are negatively correlated due to the combination of relatedness and IGEs.

255 When we remove IGEs by setting  $\psi = 0$ , Equation 12 becomes

256

$$257 \quad \beta_N^2 + (1+r)\beta_N\beta_S + r\beta_S^2 < 0. \quad (13)$$

258

259 In Figure 1, we show the regions where the condition in Equation 13 is satisfied for two  
260 different scenarios: when a trait confers an individual benefit ( $\beta_N > 0$ ) and when a trait is  
261 costly to self ( $\beta_N < 0$ ). Only the regions where the trait will increase by natural selection

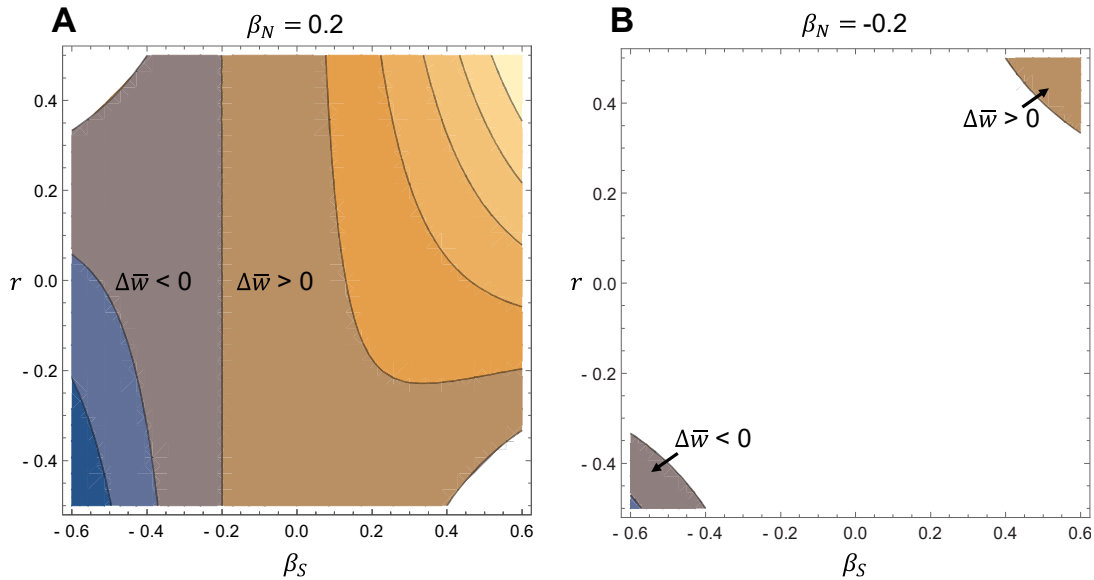

**Figure 1.** Conditions for the evolution of maladaptation derived from Equation 13. Here we consider a single trait under positive (A) or negative (B) nonsocial selection ( $\beta_N$ ). Regions where selection leads to an increase in fitness are shown in orange, and regions where fitness decreases are shown in blue. Regions where the trait cannot increase via natural selection are shown in white. Contour lines represent increments of 0.066. Maladaptation occurs when social selection ( $\beta_S$ ) negative and outweighs individual benefits (A, left) or in the evolution of spite (B, bottom left corner).

262 ( $\Delta \bar{w} > 0$ ) are shown. Figure 1 shows that maladaptation can occur in two different scenarios.  
 263 The most likely scenario occurs when a trait may either be beneficial to self and harmful to  
 264 others ( $\beta_N > 0$ ,  $\beta_S < 0$ ), which represents selfishness or competition (Figure 1A, left side).  
 265 This scenario corresponds to classic results showing that interspecific competition may lead  
 266 to selection that decreases population fitness (Cooke et al. 1990; Matsuda and Abrams 1994;  
 267 Gyllenberg and Parvinen 2001; Webb 2003; Fisher and McAdam 2019; Svensson and  
 268 Connallon 2019; Henriques and Osmond 2020). As a selfish or competitive trait increases by  
 269 natural selection, the trait imposes fitness costs on an individual's social interactants. If the  
 270 magnitude of  $\beta_S$  is large enough, this will lead to an evolutionary decrease in population  
 271 mean fitness (Figure 1A). In Equation 13, this effect is caused primarily by the second term.  
 272 When  $\beta_N \beta_S < 0$  and is relatively large in magnitude, social costs will tend to overwhelm  
 273 individual benefits and fitness will decrease even as the trait itself evolves. Relatedness  
 274 interacts with this effect in a complex way. When  $r > 0$ , relatives tend to pay the social cost.  
 275 As relatedness increases, eventually the accumulation of costs to relatives means that the trait

276 cannot increase by natural selection (Figure 1A, upper left corner). When  $r < 0$ , an  
277 individual is more likely to interact with nonrelatives than would be expected by chance. As  $r$   
278 becomes more negative, the third term in Equation 13 becomes important, intensifying the  
279 effect of maladaptation (Figure 1A, bottom left corner).

280         When  $\beta_N < 0$ , the regions in which the trait may evolve are limited (Figure 1B).  
281 Hamilton's (1964) rule predicts the evolution of a costly trait in two scenarios. The classic  
282 case is altruism, where a costly trait leads to a social benefit ( $\beta_S > 0$ ). This can only occur  
283 when relatedness is high enough to give a product with social benefits that outweighs  
284 individual costs (Figure 1B, upper right corner). The evolution of altruism leads to an  
285 increase in population fitness as would be expected from previous work (e.g. Bijma 2010b;  
286 but see Henriques and Osmond 2020 for one scenario where the evolution of altruism may  
287 lead to a decrease in fitness). An interesting case arises when  $\beta_N$  and  $\beta_S$  are both negative,  
288 which corresponds to the selection expected for a spiteful behavior. If  $r$  is negative and of  
289 large enough magnitude, a spiteful trait can evolve (Gardner and West 2004), which in our  
290 model leads to an evolved decrease in fitness as both individuals and social partners suffer a  
291 fitness cost (Figure 1B, bottom left). From Equation 13, it is evident that this effect arises  
292 when the third term is sufficiently negative to overwhelm the other two terms, which will be  
293 positive in this scenario.

294         Although Equation 13 is written for pairwise interactions, it can be generalized to  
295 larger social groups by replacing  $\beta_S$  with  $n\beta_S$ , where  $n$  is the number of groupmates  
296 excluding the focal individual. When doing so, the condition for the evolution of  
297 maladaptation in Equation 13 is equivalent to results derived from variance-component based  
298 models that include IGEs for fitness (Bijma 2010b; Fisher and McAdam 2019). In such  
299 models, the trait under selection is fitness itself, so  $G\beta_N^2$  would represent the direct genetic  
300 variance for fitness,  $n^2G\beta_S^2$  would represent indirect genetic variance for fitness, and  $G\beta_N\beta_S$   
301 would represent the direct-indirect covariance. Fisher and McAdam (2019) noted that the  
302 most likely scenario for maladaptation occurs when the direct-indirect covariance is negative  
303 and further from zero than the direct genetic variance for fitness. Our trait-based model  
304 corresponds to this conclusion and further shows that this scenario is most likely when social  
305 selection is strong and acting in opposition to nonsocial selection.

306 In the special case with no relatedness, Equation 13 reduces to

307

308 
$$\beta_N(\beta_N + \beta_S) < 0 \quad (14a)$$

309 or

310 
$$\frac{\beta_S}{\beta_N} < -1. \quad (14b)$$

311

312 Thus, when non-relatives interact in the absence of IGEs, maladaptation is driven only by the  
313 magnitude and sign of the selection gradients. As discussed above, the most likely scenario  
314 satisfying the condition in Equation 14 is strong social competition, where positive values of  
315 a trait are beneficial to self ( $\beta_N > 0$ ) but harmful to others ( $\beta_S < 0$ ), and the magnitude of  
316 the harm outweighs the benefit ( $|\beta_S| > |\beta_N|$ ). As the selfish trait increases each generation,  
317 the population fitness declines. If the trait were harmful to self ( $\beta_N < 0$ ) and beneficial to  
318 others ( $\beta_S > 0$ ) however, which represents an altruistic trait, the trait would be removed by  
319 natural selection. This is because in the absence of relatedness and IGEs, social selection  
320 would not contribute to a response to selection and altruism cannot evolve (Bijma and Wade  
321 2008; McGlothlin et al. 2010).

322

### 323 **Empirical applications**

324 The results of our model support previous work indicating that selection arising from social  
325 interactions can decrease population mean fitness, particularly in the case of competition  
326 (Wright 1969; Matsuda and Abrams 1994; Gyllenberg and Parvinen 2001; Webb 2003;  
327 Hadfield et al. 2011; Fisher and McAdam 2019; Svensson and Connallon 2019; Henriques  
328 and Osmond 2020). However, because our results are given in terms of quantitative genetic  
329 selection gradients, the parameters of our model may be readily estimated in natural  
330 populations, leading to empirical tests of the contribution of phenotypic selection to  
331 maladaptation. Nonsocial and social selection gradients may be estimated in natural  
332 populations via a modification of the standard Lande-Arnold (1983) method by incorporating  
333 social phenotypes into a multiple regression as in Equation 5 (Wolf et al. 1999). Once  
334 selection gradients have been estimated, they may be compared to the vector of phenotypic  
335 responses to selection (either predicted or observed) using Equation 8 or 9 to test whether

336 selection is contributing to maladaptation in a given generation. Below we outline how  
337 different types of data may be used for such tests.

338         The most straightforward empirical test of the role of social selection in maladaptation  
339 would involve studying a population for at least two generations. In the first generation,  
340 measurements of the phenotypes of focal and social individuals and relative fitness from the  
341 same individuals (preferably measured as relative lifetime reproductive success) would be  
342 used to estimate nonsocial and social selection gradients. In the second generation,  
343 measurements of the same phenotypes as in the previous generation would be used to  
344 estimate evolutionary change ( $\Delta\bar{z}$ ). Then, Equation 8 or 9 could be used to test for  
345 maladaptation by taking the product or the angle between the vector of total selection and the  
346 vector of evolutionary change.

347         If quantitative genetic data are available, the predicted response to selection may be  
348 substituted for observed evolutionary change. For phenotypes involving social interactions,  
349 the total predicted evolutionary change involves estimates of the additive genetic  
350 (co)variance matrix  $\mathbf{G}$ , IGEs, and relatedness (Bijma and Wade 2008; McGlothlin et al.  
351 2010). IGEs may be measured using a variance-component model or a trait-based model,  
352 which make equivalent predictions of evolutionary response to selection (McGlothlin et al.  
353 2010). However, because IGEs are difficult to measure in practice (McGlothlin and Brodie  
354 2009; Bijma 2010a), this approach may be infeasible in many cases if IGEs cannot be  
355 ignored. Alternatively, the genetic covariance between traits and fitness, if estimable from the  
356 data, can be used to predict phenotypic evolutionary change (Morrissey et al. 2010;  
357 Morrissey et al. 2012). Using predicted evolutionary change is beneficial for two reasons.  
358 First, it helps disentangle genetic shifts in the population mean from environmental change,  
359 which might bias the method outlined above. Second, it may allow the application of  
360 Equation 8 or 9 when phenotypic data are not available from the offspring generation.

361         In the absence of quantitative genetic data or observed evolutionary change, it is  
362 possible to use a phenotypic version of Equation 8 or 9 as a proxy to investigate whether  
363 social interactions can lead to maladaptation. In place of  $\Delta\bar{z}$ , one may substitute the realized  
364 selection differential  $\mathbf{s} = \mathbf{P}\boldsymbol{\beta}_N + n\mathbf{C}^I\boldsymbol{\beta}_S$ , where  $\mathbf{P}$  is the phenotypic (co)variance matrix and  
365  $\mathbf{C}^I$  is the covariance matrix of the phenotypes of interacting individuals (Wolf et al. 1999).  
366 This vector represents the total effect of phenotypic selection on the mean phenotype of the  
367 population before accounting for genetic transmission. Both  $\mathbf{P}$  and  $\mathbf{C}^I$  include effects of

368 relatedness and IGEs (Moore et al. 1997; Wolf et al. 1999), allowing them to act as  
369 surrogates for their genetic counterparts. Relatedness and IGEs are particularly important for  
370  $\mathbf{C}^I$ : random interactions with no IGEs should lead to elements of  $\mathbf{C}^I$  that are close to zero,  
371 while both relatedness and IGEs may lead to either positive or negative values (Wolf et al.  
372 1999). The disadvantage of this approximation, however, is that environmental sources of  
373 (co)variance also contribute to both  $\mathbf{P}$  and  $\mathbf{C}^I$ , making  $\mathbf{s}$  potentially deviate from  $\Delta\bar{\mathbf{z}}$ . If such  
374 deviations are primarily in magnitude, the purely phenotypic version of Equation 9 will still  
375 be a useful to indicate whether social interactions will alter the change in mean fitness, but if  
376 environmental effects lead  $\mathbf{s}$  and  $\Delta\bar{\mathbf{z}}$  to differ in direction, Equation 9 may be misleading. We  
377 argue that the benefits of such phenotypic approximations are likely to outweigh their costs.  
378 Using a phenotypic version of Equation 9 will allow a much wider application of our results  
379 to systems where collecting quantitative genetic data is difficult or impossible, providing a  
380 much broader picture of the potential importance of social selection for maladaptation at the  
381 expense of a degree of accuracy.

382 Finally, we note that the simplest test of the contribution of social selection to  
383 maladaptation can be conducted with selection gradients alone. Equation 14 shows that when  
384 relatedness and IGEs are absent, the contribution of social selection on a single trait to  
385 maladaptation depends only on the signs and relative magnitude of the two selection  
386 gradients. Specifically, a single trait can be considered to contribute to maladaptation if social  
387 selection is stronger than natural selection and opposite in sign. Further, as shown in Figure 1,  
388 the selection gradients dominate the direction of the predicted change in population fitness  
389 unless the covariance between interactants is strong. Thus, selection gradients alone may be  
390 used as a rough estimate of whether a single trait contributes to maladaptation. Data from  
391 natural populations suggest that the condition in Equation 14b may hold for some cases of  
392 competition. Fisher and Pruitt (2019) reviewed studies in which nonsocial and social  
393 selection were both measured. These two selection gradients often differed in sign, indicating  
394 conflict, and in a few cases conflicting social selection was stronger than nonsocial selection.  
395 Intriguingly, one such case involved selection for arrival date in a territorial songbird, hinting  
396 that social competition for nest sites may be individually beneficial but detrimental to  
397 population mean fitness (Farine and Sheldon 2015).

398

## 399 **Inclusive fitness**

400 Our results align with previous studies showing that natural selection does not always lead to  
401 an increase in population mean fitness when social interactions occur. While we have equated  
402 a decrease in population mean fitness with maladaptation, this view is not universally held.  
403 For example, Gardner and Grafen have argued that because selection tends to optimize  
404 inclusive fitness, adaptation should be viewed from the perspective of inclusive fitness rather  
405 than population mean fitness (Grafen 2006; Gardner 2009; Gardner and Grafen 2009). As  
406 defined by Hamilton (1964), inclusive fitness removes fitness effects of social partners but  
407 adds in fitness effects on social partners, weighted by relatedness (or when IGEs are present,  
408 by a function of relatedness and IGEs, McGlothlin et al. 2010). Thus, although social context  
409 is important, inclusive fitness effects are defined as arising from the focal individual.  
410 Inclusive fitness theory predicts that individuals are expected to act as if they are maximizing  
411 inclusive fitness, which provides the rationale for using it to define adaptation (Hamilton  
412 1964; Dawkins 1982; Grafen 2006; Gardner and Grafen 2009; Bijma 2010b). Bijma's  
413 (2010b) results, which show that the partial increase in population mean fitness predicted by  
414 Fisher's fundamental theorem is identical to the predicted increase in inclusive fitness,  
415 support this perspective.

416 By defining inclusive fitness as a function of nonsocial and social selection as in  
417 (McGlothlin et al. 2010) and following the logic of Equations 1-4, the change in mean  
418 inclusive relative fitness is predicted by

419

$$420 \quad \Delta \bar{w}_{inc} = (\boldsymbol{\beta}_N + n \mathbf{C}_{AZ}^{-1} \mathbf{C}_{AZ}' \boldsymbol{\beta}_S)^T \Delta \bar{\mathbf{z}}, \quad (15)$$

421

422 which, although expressed in different notation, is equivalent to Equation 37 of Hadfield and  
423 Thomson (2017). In Equation 15, the covariance matrices are the multivariate equivalents of  
424 the covariances in Equation 7 (McGlothlin et al. 2010). Hadfield and Thomson (2017) show  
425 that, except in the case of singularity of  $\mathbf{G}$ , Equation 15 is always positive, indicating that  
426 relative inclusive fitness always increases even when population mean fitness does not.  
427 Comparing Equation 15 to Equation 8 shows why inclusive fitness should always increase,  
428 even while population mean fitness may decrease. As shown in Equation 8, the contribution  
429 of social selection to the change in population mean fitness does not depend on the matrix



430  $C_{AZ'}$ . Because this matrix determines the contribution of social selection to phenotypic  
431 evolutionary change, the total effect of selection on fitness can diverge from evolutionary  
432 response, causing an evolutionary decrease in population mean fitness. However, in Equation  
433 15,  $C_{AZ'}$  determines the effect of social selection on both change in inclusive fitness and  
434 evolutionary response to selection, meaning the two should always be aligned. Organisms  
435 should therefore act to maximize their inclusive fitness, even if this means reducing the  
436 fitness of others and ultimately lowering population mean fitness.

437

## 438 **Conclusion**

439 Here we show that previous treatments of maladaptation via selection (e.g. Fisher and  
440 McAdam 2019; Svensson and Connallon 2019) may be usefully viewed from the perspective  
441 of social selection. When social selection is strong and in conflict with nonsocial selection,  
442 and/or when there is strong negative covariance in the phenotypes of interacting individuals,  
443 the increase in population mean fitness predicted by Fisher's fundamental theorem may be  
444 overwhelmed by a deterioration of the social environment, leading to maladaptation.  
445 Interestingly, the conditions for maladaptation are identical to the conditions previously  
446 identified for responses to selection that occur in an opposing direction to selection itself  
447 (Fisher and Pruitt 2019). Indeed, the crucial test for whether a group of traits contributes to  
448 maladaptation involves the misalignment of selection and its predicted response.

449 Our results also provide further rationale for measuring social selection in the wild  
450 (Wolf et al. 1999). Although estimates of social selection are accumulating (Formica et al.  
451 2011; Farine and Sheldon 2015; Fisher and Pruitt 2019), they are still rare. Most arguments  
452 advocating for the measurement of social selection consider it in the context of altruism and  
453 Hamilton's rule (McGlothlin et al. 2014), but the fact that the strength of social selection may  
454 reflect whether a population is undergoing adaptation or maladaptation indicates that it may  
455 be equally important in the context of social competition.

456

## 457 **Acknowledgments**

458 We thank Kim Hughes and Anjanette Baker for organizing the symposium and editing this  
459 theme issue. We thank Andrew Hendry, Andrew McAdam, and Josef Uyeda for helpful  
460 discussions and comments on the manuscript.

## 461 **References**

- 462 Arnold SJ, Pfrender ME, Jones AG. 2001. The adaptive landscape as a conceptual bridge  
463 between micro- and macroevolution. *Genetica*. 112-113:9-32.
- 464 Arnold SJ, Wade MJ. 1984. On the measurement of natural and sexual selection:  
465 applications. *Evolution*. 38:720-734.
- 466 Bijma P. 2010a. Estimating indirect genetic effects: precision of estimates and optimum  
467 designs. *Genetics*. 186:1013-1028.
- 468 Bijma P. 2010b. Fisher's fundamental theorem of inclusive fitness and the change in fitness  
469 due to natural selection when conspecifics interact. *J. Evol. Biol.* 23:194-206.
- 470 Bijma P, Wade MJ. 2008. The joint effects of kin, multilevel selection and indirect genetic  
471 effects on response to genetic selection. *J. Evol. Biol.* 21:1175-1188.
- 472 Bonnet T, Morrissey MB, Kruuk LEB. 2019. Estimation of genetic variance in fitness, and  
473 inference of adaptation, when fitness follows a log-normal distribution. *J Hered.*  
474 110:383-395.
- 475 Brady SP, Bolnick DI, Angert AL, Gonzalez A, Barrett RDH, Crispo E, Derry AM, Eckert  
476 CG, Fraser DJ, Fussmann GF, Guichard F, Lamy T, McAdam AG, Newman AEM,  
477 Paccard A, Rolshausen G, Simons AM, Hendry AP. 2019a. Causes of maladaptation.  
478 *Evol Appl.* 12:1229-1242.
- 479 Brady SP, Bolnick DI, Barrett RDH, Chapman L, Crispo E, Derry AM, Eckert CG, Fraser  
480 DJ, Fussmann GF, Gonzalez A, Guichard F, Lamy T, Lane J, McAdam AG, Newman  
481 AEM, Paccard A, Robertson B, Rolshausen G, Schulte PM, Simons AM, Vellend M,  
482 Hendry A. 2019b. Understanding maladaptation by uniting ecological and  
483 evolutionary perspectives. *Am. Nat.* 194:495-515.
- 484 Burt A. 1995. The evolution of fitness. *Evolution*. 49:1-8.
- 485 Cooke F, Taylor PD, Francis CM, Rockwell RF. 1990. Directional selection and clutch size  
486 in birds. *Am. Nat.* 136:261-267.
- 487 Dawkins R. 1982. *The Extended Phenotype*. Oxford Univ. Press, Oxford.
- 488 Estes S, Arnold SJ. 2007. Resolving the paradox of stasis: models with stabilizing selection  
489 explain evolutionary divergence at all timescales. *Am. Nat.* 169:227-244.
- 490 Farine DR, Sheldon BC. 2015. Selection for territory acquisition is modulated by social  
491 network structure in a wild songbird. *J. Evol. Biol.* 28:547-556.
- 492 Fisher DN, McAdam AG. 2019. Indirect genetic effects clarify how traits can evolve even  
493 when fitness does not. *Evol. Lett.* 3:4-14.

- 494 Fisher DN, Pruitt JN. 2019. Opposite responses to selection and where to find them. *J. Evol.*  
495 *Biol.* 32:505-518.
- 496 Fisher RA. 1930. *The Genetical Theory of Natural Selection*. Clarendon Press, Oxford.
- 497 Formica VA, McGlothlin JW, Wood CW, Augat ME, Butterfield RE, Barnard ME, Brodie  
498 ED, III. 2011. Phenotypic assortment mediates the effect of social selection in a wild  
499 beetle population. *Evolution*. 65:2771-2781.
- 500 Frank SA. 1997. The Price Equation, Fisher's fundamental theorem, kin selection, and causal  
501 analysis. *Evolution*. 51:1712-1729.
- 502 Frank SA, Slatkin M. 1992. Fisher's fundamental theorem of natural selection. *Trends Ecol.*  
503 *Evol.* 7:92-95.
- 504 Gardner A. 2009. Adaptation as organism design. *Biol. Lett.* 5:861-864.
- 505 Gardner A, Grafen A. 2009. Capturing the superorganism: a formal theory of group  
506 adaptation. *J. Evol. Biol.* 22:659-671.
- 507 Gardner A, West SA. 2004. Spite and the scale of competition. *J. Evol. Biol.* 17:1195-1203.
- 508 Grafen A. 2006. Optimization of inclusive fitness. *J. Theor. Biol.* 238:541-563.
- 509 Gyllenberg M, Parvinen K. 2001. Necessary and sufficient conditions for evolutionary  
510 suicide. *B Math Biol.* 63:981-993.
- 511 Hadfield JD, Thomson CE. 2017. Interpreting selection when individuals interact. *Methods*  
512 *Ecol Evol.* 8:688-699.
- 513 Hadfield JD, Wilson AJ, Kruuk LEB. 2011. Cryptic evolution: Does environmental  
514 deterioration have a genetic basis? *Genetics*. 187:1099-1113.
- 515 Hamilton WD. 1964. The genetical evolution of social behavior. I. *J. Theor. Biol.* 7:1-16.
- 516 Hendry AP. 2017. *Eco-Evolutionary Dynamics*. Princeton Univ. Press, Princeton, N.J.
- 517 Hendry AP, Schoen DJ, Wolak ME, Reid JM. 2018. The contemporary evolution of fitness.  
518 *Annu. Rev. Ecol. Evol. Syst.* 49:457-476.
- 519 Henriques GJB, Osmond MM. 2020. Cooperation can promote rescue or lead to evolutionary  
520 suicide during environmental change. *Evolution*. 74:1255-1273.
- 521 Hereford J, Hansen TF, Houle D. 2004. Comparing strengths of directional selection: How  
522 strong is strong? *Evolution*. 58:2133-2143.
- 523 Hoekstra HE, Hoekstra JM, Berrigan D, Vignieri SN, Hoang A, Hill CE, Beerli P, Kingsolver  
524 JG. 2001. Strength and tempo of directional selection in the wild. *Proc. Natl. Acad.*  
525 *Sci. USA.* 98:9157-9160.
- 526 Houle D. 1992. Comparing evolvability and variability of quantitative traits. *Genetics*.  
527 130:195-204.

- 528 Kingsolver JG, Diamond SE. 2011. Phenotypic selection in natural populations: What limits  
529 directional selection? *Am. Nat.* 177:346-357.
- 530 Kingsolver JG, Hoekstra HE, Hoekstra JM, Berrigan D, Vignieri SN, Hill CE, Hoang A,  
531 Gilbert P, Beerli P. 2001. The strength of phenotypic selection in natural populations.  
532 *Am. Nat.* 157:245-261.
- 533 Kokko H, Brooks R. 2003. Sexy to die for? Sexual selection and the risk of extinction. *Ann*  
534 *Zool Fenn.* 40:207-219.
- 535 Lande R. 1976. Natural selection and random genetic drift in phenotypic evolution.  
536 *Evolution.* 30:314-334.
- 537 Lande R. 1979. Quantitative genetic analysis of multivariate evolution, applied to brain:body  
538 size allometry. *Evolution.* 33:402-416.
- 539 Lande R, Arnold SJ. 1983. The measurement of selection on correlated characters. *Evolution.*  
540 37:1210-1226.
- 541 Matsuda H, Abrams PA. 1994. Runaway evolution to self-extinction under asymmetrical  
542 competition. *Evolution.* 48:1764-1772.
- 543 Maynard Smith J. 1982. *Evolution and the Theory of Games*. Cambridge Univ. Press,  
544 Cambridge.
- 545 McGlothlin JW, Brodie ED, III. 2009. How to measure indirect genetic effects: the  
546 congruence of trait-based and variance-partitioning approaches. *Evolution.* 63:1785-  
547 1795.
- 548 McGlothlin JW, Moore AJ, Wolf JB, Brodie ED, III. 2010. Interacting phenotypes and the  
549 evolutionary process. III. Social evolution. *Evolution.* 64:2558-2574.
- 550 McGlothlin JW, Wolf JB, Brodie ED, Moore AJ. 2014. Quantitative genetic versions of  
551 Hamilton's rule with empirical applications. *Philos T R Soc B.* 369:20130358.
- 552 Merilä J, Kruuk LEB, Sheldon BC. 2001a. Cryptic evolution in a wild bird population.  
553 *Nature.* 412:76-79.
- 554 Merilä J, Sheldon BC, Kruuk LEB. 2001b. Explaining stasis: microevolutionary studies in  
555 natural populations. *Genetica.* 112-113:199-222.
- 556 Moore AJ, Brodie ED, III, Wolf JB. 1997. Interacting phenotypes and the evolutionary  
557 process: I. Direct and indirect genetic effects of social interactions *Evolution.*  
558 51:1352-1362.
- 559 Morrissey MB, Hadfield JD. 2012. Directional selection in temporally replicated studies Is  
560 remarkably consistent. *Evolution.* 66:435-442.

- 561 Morrissey MB, Kruuk LEB, Wilson AJ. 2010. The danger of applying the breeder's equation  
562 in observational studies of natural populations. *J. Evol. Biol.* 23:2277-2288.
- 563 Morrissey MB, Parker DJ, Korsten P, Pemberton JM, Kruuk LEB, Wilson AJ. 2012. The  
564 prediction of adaptive evolution: empirical application of the secondary theorem of  
565 selection and comparison to the breeder's equation. *Evolution.* 66:2399-2410.
- 566 Orr HA. 2009. Fitness and its role in evolutionary genetics. *Nature Rev. Genet.* 10:531-539.
- 567 Price GR. 1970. Selection and covariance. *Nature.* 227:520-521.
- 568 Price GR. 1972a. Fisher's 'fundamental theorem' made clear. *Ann. Hum. Genet.* 36:129-+.
- 569 Price GR. 1972b. Extension of covariance selection mathematics. *Ann. Hum. Genet.* 35:485-  
570 490.
- 571 Queller DC. 2014. Joint phenotypes, evolutionary conflict and the fundamental theorem of  
572 natural selection. *Philos. Trans. R. Soc. Lond. B.* 369.
- 573 Rice WR, Holland B. 1997. The enemies within: intergenomic conflict, interlocus contest  
574 evolution (ICE), and the intraspecific Red Queen. *Behav. Ecol. Sociobiol.* 41:1-10.
- 575 Siepielski AM, DiBattista JD, Carlson SM. 2009. It's about time: the temporal dynamics of  
576 phenotypic selection in the wild. *Ecol. Lett.* 12:1261-1276.
- 577 Siepielski AM, Gotanda KM, Morrissey MB, Diamond SE, DiBattista JD, Carlson SM. 2013.  
578 The spatial patterns of directional phenotypic selection. *Ecol. Lett.* 16:1382-1392.
- 579 Simpson GG. 1944. *Tempo and Mode in Evolution.* Columbia Univ. Press, New York.
- 580 Sinervo B, Calsbeek R. 2006. The developmental, physiological, neural, and genetical causes  
581 and consequences of frequency-dependent selection in the wild. *Annu. Rev. Ecol.*  
582 *Evol. Syst.* 37:581-610.
- 583 Sinervo B, Lively CM. 1996. The rock-paper scissors game and the evolution of alternative  
584 male strategies. *Nature.* 380:240-243.
- 585 Svensson EI, Calsbeek R. 2012. *The Adaptive Landscape in Evolutionary Biology.* Oxford  
586 Univ. Press, Oxford.
- 587 Svensson EI, Connallon T. 2019. How frequency-dependent selection affects population  
588 fitness, maladaptation and evolutionary rescue. *Evol Appl.* 12:1243-1258.
- 589 Webb C. 2003. A complete classification of Darwinian extinction in ecological interactions.  
590 *Am. Nat.* 161:181-U181.
- 591 West-Eberhard MJ. 1979. Sexual selection, social competition, and evolution. *Proc. Am.*  
592 *Phil. Soc.* 123:222-234.
- 593 Wilson AJ. 2014. Competition as a source of constraint on life history evolution in natural  
594 populations. *Heredity.* 112:70-78.

- 595 Wilson AJ, Gelin U, Perron M-C, Réale D. 2009. Indirect genetic effects and the evolution of  
596 aggression in a vertebrate system. *Proc. R. Soc. Lond. B.* 276:533-541.
- 597 Wilson AJ, Morrissey MB, Adams MJ, Walling CA, Guinness FE, Pemberton JM, Clutton-  
598 Brock TH, Kruuk LEB. 2011. Indirect genetic effects and evolutionary constraint: an  
599 analysis of social dominance in red deer, *Cervus elaphus*. *J. Evol. Biol.* 24:772-783.
- 600 Wolf JB. 2003. Genetic architecture and evolutionary constraint when the environment  
601 contains genes. *Proc. Natl. Acad. Sci. USA.* 100:4655-4660.
- 602 Wolf JB, Brodie ED, III, Moore AJ. 1999. Interacting phenotypes and the evolutionary  
603 process. II. Selection resulting from social interactions. *Am. Nat.* 153:254-266.
- 604 Wolf JB, Wade MJ. 2001. On the assignment of fitness to parents and offspring: whose  
605 fitness is it and when does it matter? *J. Evol. Biol.* 14:347-356.
- 606 Wright S. 1932. The roles of mutation, inbreeding, crossbreeding and selection in evolution.  
607 Pp. 356-366. *Proceedings of the 26th International Congress of Genetics*.
- 608 Wright S. 1942. Statistical genetics and evolution. *Bulletin of the American Mathematical*  
609 *Society.* 48:223-246.
- 610 Wright S. 1969. *Evolution and the genetics of populations. Vol. 2. The theory of gene*  
611 *frequencies.* Univ. of Chicago Press, Chicago.
- 612
